# Supplementary material
Source: PubMed Central journal article supplement (PMC4000091)

**Fig. S2.**

A) Replicative lifespan assay (RLS) of wt (black line, mean RLS = 24,9, n=204) and  $P_{GPD}$ -*UBP3* (red line, mean RLS = 21,8, n=100). Statistical analysis and P- values can be found in table S4.

B) The indicated strains were transformed with a plasmid: p $P_{GAL}$ -GFP-HSP104, grown over night in galactose, diluted and allowed to grow exponentially before subjected to a 30 minute heat shock at 42 C. Images shown are conventional raw widefield fluorescence images before and after heat stress.

C) FACS analysis showing the relative GFP-Ubc9<sup>ts</sup> signal (levels) over time at 37°C. Data is represented as the mean ( $\pm$  SD) of at least 3 experiments.

D) Cells expressing  $\Delta$ ssCL\*myc under the *PRC1* promoter on a centromeric plasmid were spotted in a five-fold serial dilution on indicated media and incubated for 4 days at 30°C.

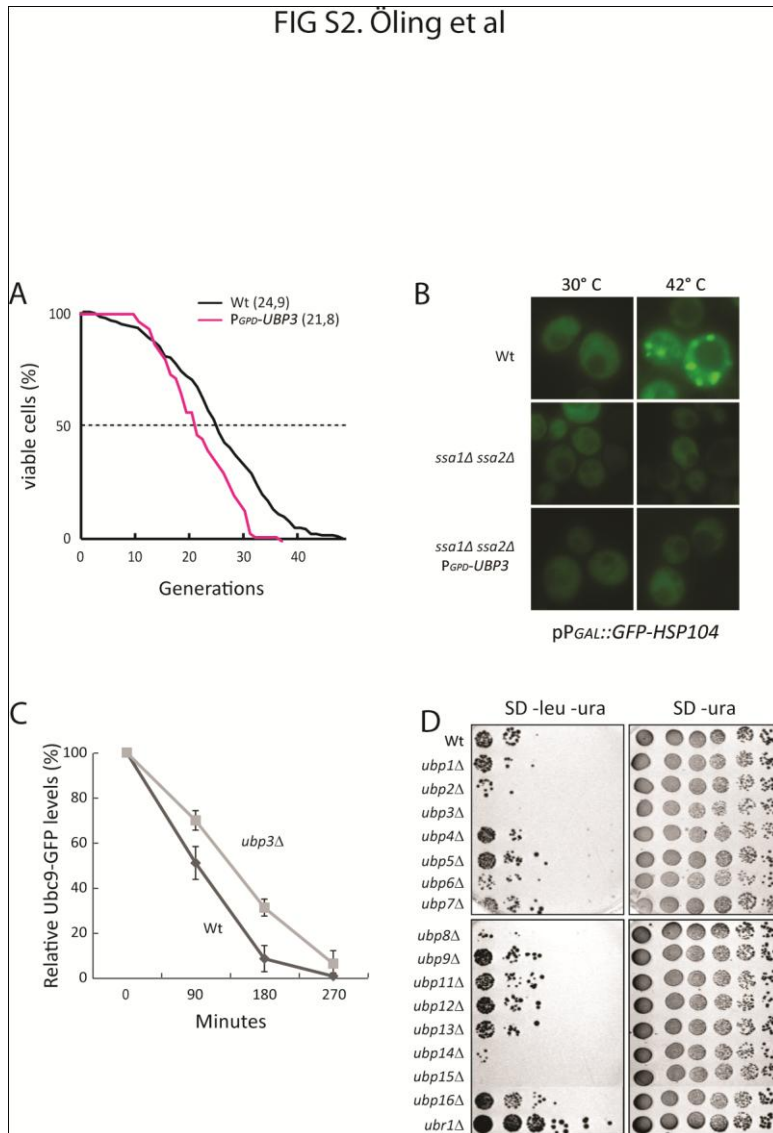

Supplement: embj0033-0747-sd2.pdf [file embj0033-0747-sd2.pdf]
