# Supplementary material
Source: PubMed Central journal article supplement (PMC4000091)
Supplement: embj0033-0747-sd3.pdf [file embj0033-0747-sd3.pdf]

**Supplementary Table I.** Strains used in this study

| Strain background | Genotype                                                                                                                                                      | Source                                      |
|-------------------|---------------------------------------------------------------------------------------------------------------------------------------------------------------|---------------------------------------------|
| BY4741            | <i>MATa his31Δ leu2Δ0 met15Δ0 ura3Δ0</i>                                                                                                                      | Euroscarf, (Brachmann et al, 1998)          |
| BY4742            | <i>MATα his3Δ leu2Δ lysΔ ura3Δ</i>                                                                                                                            | This study                                  |
| BY4741            | <i>ubp3Δ::KANMX4</i>                                                                                                                                          | Euroscarf, (Brachmann et al, 1998)          |
| ATCC 201388       | <i>MATa his3Δ1 leu2Δ0 met15Δ0 ura3Δ0 SSA2-GFP::HIS3MX</i>                                                                                                     | (Huh et al, 2003)                           |
| BY4741            | <i>SSA2-GFP::HIS3MX6</i>                                                                                                                                      | This study                                  |
| BY4741            | <i>SSA2-GFP::HIS3MX6 ubp3Δ::HPHMX4</i>                                                                                                                        | This study                                  |
| BY4741            | <i>SSA1-mCherry::HPHMX4 NUP49-GFP::HIS3MX</i>                                                                                                                 | This study                                  |
| BY4741            | <i>SSA1-mCherry::HPHMX4 NUP49-GFP::HIS3MX ubp3Δ::KANMX4</i>                                                                                                   | This study                                  |
| BY4741            | <i>SSA1-mCherry::HPHMX4 SPC42-GFP::HIS3MX</i>                                                                                                                 | This study                                  |
| BY4741            | <i>SSA1-mCherry::HPHMX4 SPC42-GFP::HIS3MX ubp3Δ::KANMX4</i>                                                                                                   | This study                                  |
| UCC5179           | <i>MATa ade2::hisG his3 leu2 lys2 ura3Δ0 trp1Δ63 hoΔ::PSCW11-cre-EBD78-NATMX loxP-UBC9-loxPLEU2 loxP-CDC20-Intron-loxP-HPHMX</i>                              | (Lindstrom & Gottschling, 2009)             |
| UCC5179           | <i>MATa ade2::hisG his3 leu2 lys2 ura3Δ0 trp1Δ63 hoΔ::PSCW11-cre-EBD78-NATMX loxP-UBC9-loxPLEU2 loxP-CDC20-Intron-loxP-HPHMX SSA2-GFP::KANMX4</i>             | This study                                  |
| UCC5179           | <i>MATa ade2::hisG his3 leu2 lys2 ura3Δ0 trp1Δ63 hoΔ::PSCW11-cre-EBD78-NATMX loxP-UBC9-loxPLEU2 loxP-CDC20-Intron-loxP-HPHMX SSA2-GFP::KANMX4 ubp3Δ::URA3</i> | This study                                  |
|                   | BY4741 <i>UBP3-TAP::HIS3</i>                                                                                                                                  | Open Biosystems; (Ghaemmaghami et al, 2003) |
| BY4741            | <i>NAT::P<sub>ADH</sub>-UBP3-TAP::HIS3</i>                                                                                                                    | This study                                  |
| BY4741            | <i>NAT::P<sub>TEF</sub>-UBP3-TAP::HIS3</i>                                                                                                                    | This study                                  |
| BY4741            | <i>NAT::P<sub>GPD</sub>-UBP3-TAP::HIS3</i>                                                                                                                    | This study                                  |
| BY4741            | <i>NAT::P<sub>GPD</sub>-UBP3</i>                                                                                                                              | This study                                  |
| BY4741            | <i>ssa1Δ::HPHMX4 ssa2Δ::KANMX4</i>                                                                                                                            | This study                                  |
| BY4742            | <i>ssa1Δ::HPHMX4 ssa2Δ::KANMX4</i>                                                                                                                            | This study                                  |
| BY4741            | <i>ssa1Δ::HPHMX4 ssa2Δ::KANMX4 UBP3-TAP::HIS3</i>                                                                                                             | This study                                  |
| BY4741            | <i>ssa1Δ::HPHMX4 ssa2Δ::KANMX4 NAT::P<sub>ADH</sub>-UBP3-TAP::HIS3</i>                                                                                        | This study                                  |
| BY4741            | <i>ssa1Δ::HPHMX4 ssa2Δ::KANMX4 NAT::P<sub>TEF</sub>-UBP3-TAP::HIS3</i>                                                                                        | This study                                  |
| BY4741            | <i>ssa1Δ::HPHMX4 ssa2Δ::KANMX4 NAT::P<sub>GPD</sub>-UBP3-TAP::HIS3</i>                                                                                        | This study                                  |
| BY4741            | <i>ssa1Δ::HPHMX4 ssa2Δ::KANMX4 NAT::P<sub>GPD</sub>-UBP3</i>                                                                                                  | This study                                  |
| BY4741            | <i>rpn4Δ::KANMX4</i>                                                                                                                                          | Euroscarf                                   |
| BY4741            | <i>ssa1Δ::HPHMX4 ssa2Δ::LEU2</i>                                                                                                                              | This study                                  |
| BY4742            | <i>ssa1Δ::HPHMX4 ssa2Δ::LEU2</i>                                                                                                                              | This study                                  |
| BY4741            | <i>ssa1Δ::HPHMX4 ssa2Δ::LEU2 rpn4Δ::KANMX4</i>                                                                                                                | This study                                  |

|        |                                                                                    |                                       |
|--------|------------------------------------------------------------------------------------|---------------------------------------|
| BY4741 | <i>ssa1Δ::HPHMX4 ssa2Δ::LEU2 P<sub>GPD</sub>::NAT-UBP3-TAP::HIS3</i>               | This study                            |
| BY4742 | <i>ssa1Δ::HPHMX4 ssa2Δ::LEU2 P<sub>GPD</sub>::NAT-UBP3-TAP::HIS3</i>               | This study                            |
| BY4741 | <i>ubr1Δ::KANMX4</i>                                                               | Euroscarf                             |
| BY4741 | <i>ubr1Δ::KANMX4 ubp3Δ::NATMX4</i>                                                 | This study                            |
| BY4741 | <i>ubr2Δ::KANMX4</i>                                                               | Euroscarf                             |
| BY4741 | <i>ssa1Δ::HPHMX4 ssa2Δ::LEU2 ubr2Δ::KANMX4 NAT::P<sub>GPD</sub>-UBP3-TAP::HIS3</i> | This study                            |
| BY4741 | <i>ssa1Δ::HPHMX4 ssa2Δ::LEU2 ssa3Δ::KANMX4</i>                                     | This study                            |
| BY4741 | <i>ssa1Δ::HPHMX4 ssa2Δ::LEU2 ssa3Δ::KANMX4 NAT::P<sub>GPD</sub>-UBP3-TAP::HIS3</i> | This study                            |
| BY4741 | <i>MATa his31Δ leu2Δ0 met15Δ0 ura3Δ0, ubp1-ubp16 (individual Δ)</i>                | Euroscarf,<br>(Brachmann et al, 1998) |

## References

Brachmann CB, Davies A, Cost GJ, Caputo E, Li J, Hieter P, Boeke JD (1998) Designer deletion strains derived from *Saccharomyces cerevisiae* S288C: a useful set of strains and plasmids for PCR-mediated gene disruption and other applications. *Yeast* **14**: 115-132

Ghaemmaghami S, Huh WK, Bower K, Howson RW, Belle A, Dephoure N, O'Shea EK, Weissman JS (2003) Global analysis of protein expression in yeast. *Nature* **425**: 737-741

Huh WK, Falvo JV, Gerke LC, Carroll AS, Howson RW, Weissman JS, O'Shea EK (2003) Global analysis of protein localization in budding yeast. *Nature* **425**: 686-691

Lindstrom DL, Gottschling DE (2009) The mother enrichment program: a genetic system for facile replicative life span analysis in *Saccharomyces cerevisiae*. *Genetics* **183**: 413-422, 411SI-413SI
