# Supplementary material
Source: PubMed Central journal article supplement (PMC4000091)
Supplement: embj0033-0747-sd4.pdf [file embj0033-0747-sd4.pdf]

**Supplementary Table II.** Oligonucleotides used in this study

| Name                   | Sequence                                                                       |
|------------------------|--------------------------------------------------------------------------------|
| UBP3 S1                | GTCTGCTACCATCATCCAGGTACCGCTTTCCTTCCATCATCATTAAAAAAATGCGTACGCTGCAGGT<br>CGAC    |
| UBP3 S2                | ATTATTGCTATATTATTTTTATGTATTTGTCTATAATACCACCCCCGTCTTAATCGATGAATTCGAGC<br>TCG    |
| UBP3 S3                | CGAAGAAGCTTCTGATTCGAGGACTGCCTATATTTAATGTATCAAAGAGAAATCGTACGCTGCAGG<br>TCGAC    |
| UBP3 S4                | AAGAGTTTTTCGGGTACATCGAGTACGACTCTTCTTGTAGCGTCTTGCATGTTTCATCGATGAATTC<br>CTGTCTG |
| UBP3 fw-<br>190        | TTCTACGGGCAAAGGCAAGG                                                           |
| UBP3 rev<br>+173       | CGATCCTGGGCGAAATCATT                                                           |
| SSA1MCHE<br>RRY FW     | AGGTGGTGCTCCTCCAGCTCCAGAGGCTGAAGGTCCAACCGTTGAAGAAGTTGAT<br>GGTCGACGGATCCCCGGG  |
| SSA1<br>MCHERRY<br>REV | CCCAGATCATTAAAAGACATTTTCGTTATTATCAATTGCCGCACCAATTGGCTTA<br>ATCGATGAATTCGAGCTCG |
| SSA2 S2                | GAGGAAAGCAAAGTAAAACCTTTTCGGATATTTACAGGGCGATCGCTAAGCTTA<br>ATCGATGAATTCGAGCTCG  |
| SSA2 S3                | AGGTGGTGCTCCTCCAGCTCCAGAAGCTGAAGGTCCAACGTGCGAAGAAGTTGAT<br>CGTACGCTGCAGGTGCAC  |
| ACT1 FW                | ACGTTCCAGCCTTCTACGTTTCCA                                                       |
| ACT1 BW                | AGTCAGTCAAATCTCTACCGGCCA                                                       |
| SSA3 FW                | AAGTAGGTGAAGATGATG                                                             |
| SSA3 BW                | CTTATATTCGTCCGTAGA                                                             |
