# Supplementary material
Source: PubMed Central journal article supplement (PMC4000091)
Supplement: embj0033-0747-sd5.pdf [file embj0033-0747-sd5.pdf]

**Supplementary Table III.** Plasmids used in this study

| Name                                 | Characteristics/expression product                      | Source                    |
|--------------------------------------|---------------------------------------------------------|---------------------------|
| p426-ADH                             | <i>2μm URA3 ADH prom</i>                                | (Mumberg et al, 1995)     |
| pUBP3-6His wt                        | <i>2μm URA3 ADH-UBP3-6His</i>                           | (Cohen et al, 2003)       |
| pUBP3-6His C469A                     | <i>2μm URA3 ADH-UBP3-6His C469A</i>                     | (Cohen et al, 2003)       |
| pRS416-SIK1-RFP                      | <i>CEN URA3 SIK1-mRFP</i>                               | (Sung & Huh, 2007)        |
| pGFP-Ubc9 <sup>ts</sup>              | <i>2μm URA3 GAL::GFP-UBC9<sup>ts</sup></i>              | (Kaganovich et al, 2008)  |
| pGFP-Ubc9 <sup>ts</sup> NLS-tdTomato | <i>2μm URA3 GAL::GFP-UBC9<sup>ts</sup> NLS-tdTomato</i> | (Kaganovich et al, 2008)  |
| yEP352                               | <i>2μm URA3</i>                                         | (Hill et al, 1986)        |
| pPDE2 ctrl                           | <i>2μm PDE2 URA3</i>                                    | (Wilson & Tatchell, 1988) |
| pΔssCL*myc                           | <i>CEN URA3 PRC1 prom-ΔssCPY*LEU2myc</i>                | (Eisele & Wolf, 2008)     |
| pPGAL::GFP-HSP104                    | <i>CEN HIS3 PGAL::GFP-HSP104</i>                        | (Tkach & Glover, 2004)    |
| pCA837                               | <i>CEN HIS3 P<sub>GPD</sub>-FLUC-EGFP</i>               | (Gowda et al, 2013)       |
| pΔssCG*                              | <i>CEN URA3 PRC1 prom-ΔssCPY*GFP</i>                    | (Medicherla et al, 2004)  |

## References

Cohen M, Stutz F, Belgareh N, Haguenaer-Tsapis R, Dargemont C (2003) Ubp3 requires a cofactor, Bre5, to specifically de-ubiquitinate the COPII protein, Sec23. *Nat Cell Biol* **5**: 661-667

Eisele F, Wolf DH (2008) Degradation of misfolded protein in the cytoplasm is mediated by the ubiquitin ligase Ubr1. *FEBS letters* **582**: 4143-4146

Gowda NK, Kandasamy G, Froehlich MS, Dohmen RJ, Andreasson C (2013) Hsp70 nucleotide exchange factor Fes1 is essential for ubiquitin-dependent degradation of misfolded cytosolic proteins. *Proceedings of the National Academy of Sciences of the United States of America* **110**: 5975-5980

Hill JE, Myers AM, Koerner TJ, Tzagoloff A (1986) Yeast/E. coli shuttle vectors with multiple unique restriction sites. *Yeast* **2**: 163-167

Kaganovich D, Kopito R, Frydman J (2008) Misfolded proteins partition between two distinct quality control compartments. *Nature* **454**: 1088-1095

Medicherla B, Kostova Z, Schaefer A, Wolf DH (2004) A genomic screen identifies Dsk2p and Rad23p as essential components of ER-associated degradation. *EMBO reports* **5**: 692-697

Mumberg D, Muller R, Funk M (1995) Yeast vectors for the controlled expression of heterologous proteins in different genetic backgrounds. *Gene* **156**: 119-122

Sung MK, Huh WK (2007) Bimolecular fluorescence complementation analysis system for in vivo detection of protein-protein interaction in *Saccharomyces cerevisiae*. *Yeast* **24**: 767-775

Tkach JM, Glover JR (2004) Amino acid substitutions in the C-terminal AAA+ module of Hsp104 prevent substrate recognition by disrupting oligomerization and cause high temperature inactivation. *J Biol Chem* **279**: 35692-35701

Wilson RB, Tatchell K (1988) SRA5 encodes the low-Km cyclic AMP phosphodiesterase of *Saccharomyces cerevisiae*. *Mol Cell Biol* **8**: 505-510
