# Supplementary material
Source: PubMed Central journal article supplement (PMC4000091)
Supplement: embj0033-0747-sd7.pdf [file embj0033-0747-sd7.pdf]

**Supplementary table V.** P-values of Ssa4p levels obtained from 2-D PAGE. P-values were obtained by a unpaired two sided t-test with 95% confidence intervals assuming equal variance. \*  $p \leq 0,05$ ; \*\*  $p \leq 0,005$ ; \*\*\*  $p \leq 0,0005$ ; n.s =  $p > 0,05$ .

|                                              | Wt 30°C | <i>ssa1Δ ssa2Δ</i><br>30°C | <i>ssa1Δ ssa2 P<sub>GPD</sub>-UBP3</i><br>30°C |
|----------------------------------------------|---------|----------------------------|------------------------------------------------|
| Wt 30°C                                      |         | 0,0012                     | 0,0009                                         |
| <i>ssa1Δ ssa2Δ</i> 30°C                      |         |                            | 0,6503                                         |
| Wt 37°C                                      | 0,0137  |                            |                                                |
| <i>ssa1Δ ssa2Δ</i> 37°C                      | 0,0005  | 0,4847                     |                                                |
| <i>ssa1Δ ssa2Δ P<sub>GPD</sub>-UBP3</i> 37°C | 0,0012  | 0,6972                     | 0,3847                                         |

|                                              | Wt 30°C | <i>ssa1Δ ssa2Δ</i><br>30°C | <i>ssa1Δ ssa2 P<sub>GPD</sub>-UBP3</i><br>30°C |
|----------------------------------------------|---------|----------------------------|------------------------------------------------|
| Wt 30°C                                      |         | **                         | **                                             |
| <i>ssa1Δ ssa2Δ</i> 30°C                      |         |                            | n.s                                            |
| Wt 37°C                                      | *       |                            |                                                |
| <i>ssa1Δ ssa2Δ</i> 37°C                      | ***     | n.s                        |                                                |
| <i>ssa1Δ ssa2Δ P<sub>GPD</sub>-UBP3</i> 37°C | **      | n.s                        | n.s                                            |
