# Supplementary material
Source: PubMed Central journal article supplement (PMC4000091)

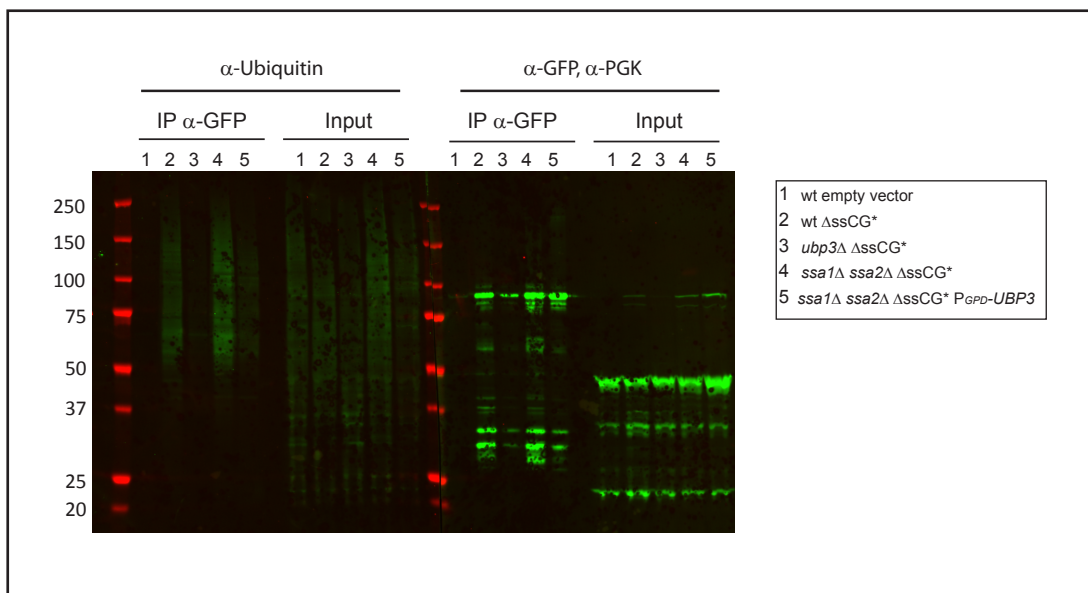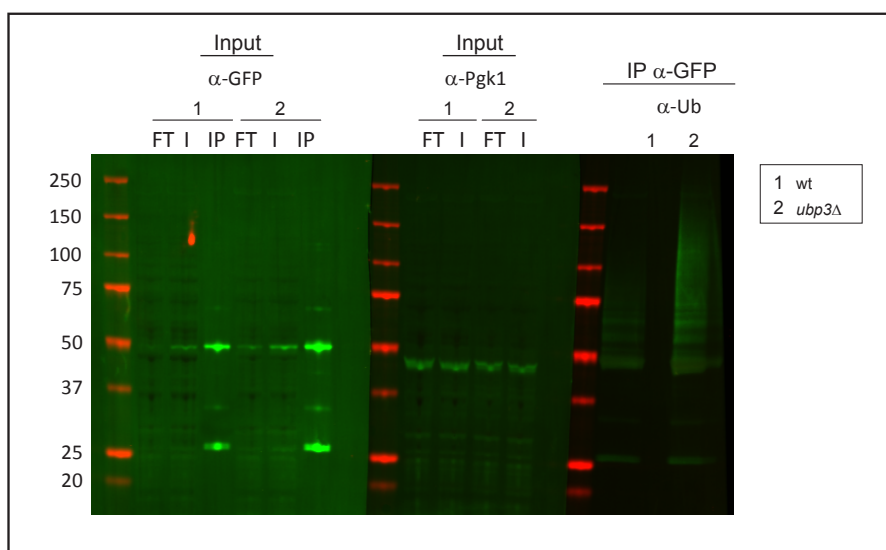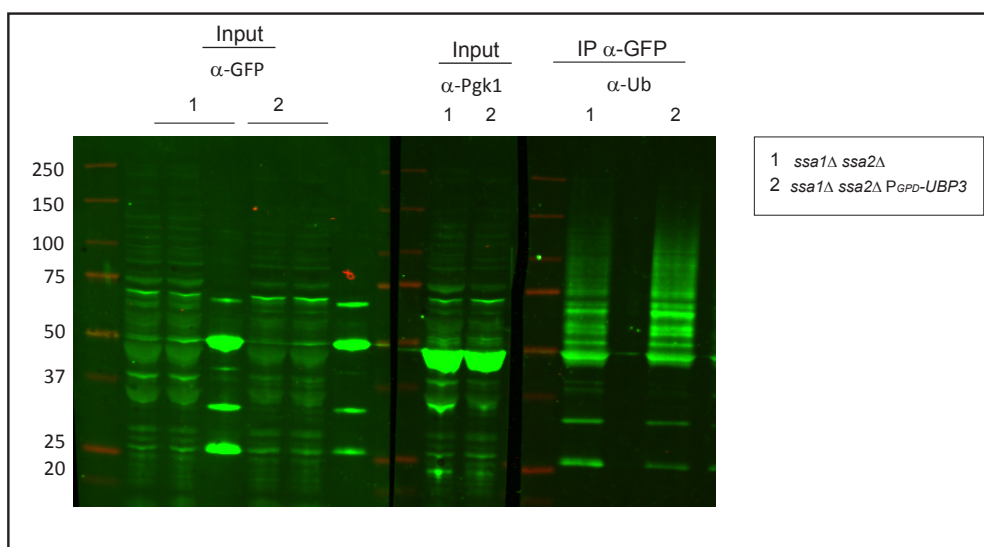

Supplement: embj0033-0747-sd9.pdf [file embj0033-0747-sd9.pdf]
